# Supplementary material for: Microfluidic MeDIP-seq for low-input methylomic analysis of mammary tumorigenesis in mice
Source: Royal Society of Chemistry journal article supplement (doi:10.1039/c8an02271b), 2019-01-01
Supplement: c8an02271b2.zip [file c8an02271b2.zip]

## Sheet: results_adenoma_vs_normal_Pvalu
chr1	3214751	3215000	ID_1
chr1	3271001	3271250	ID_2
chr1	3345751	3346000	ID_3
chr1	3525001	3525250	ID_4
chr1	3546001	3546250	ID_5
chr1	3587251	3587500	ID_6
chr1	3771251	3771500	ID_7
chr1	3901001	3901250	ID_8
chr1	3961001	3961250	ID_9
chr1	4026251	4026750	ID_10
chr1	4088251	4088500	ID_11
chr1	4249251	4249500	ID_12
chr1	4559001	4559250	ID_13
chr1	4689001	4689500	ID_14
chr1	4705501	4706000	ID_15
chr1	4815001	4815500	ID_16
chr1	4921751	4922000	ID_17
chr1	5146001	5146250	ID_18
chr1	5168001	5168250	ID_19
chr1	5347001	5347250	ID_20
chr1	5368501	5368750	ID_21
chr1	5469501	5469750	ID_22
chr1	5685501	5685750	ID_23
chr1	5728001	5728250	ID_24
chr1	5920251	5920500	ID_25
chr1	6046501	6047000	ID_26
chr1	6207751	6208250	ID_27
chr1	6357751	6358250	ID_28
chr1	6525501	6526000	ID_29
chr1	6867501	6867750	ID_30
chr1	6972501	6973000	ID_31
chr1	7068501	7068750	ID_32
chr1	7133001	7133250	ID_33
chr1	7293751	7294000	ID_34
chr1	7824251	7824500	ID_35
chr1	7843501	7843750	ID_36
chr1	7957251	7957500	ID_37
chr1	8111251	8111500	ID_38
chr1	8263501	8263750	ID_39
chr1	8265251	8265750	ID_40
chr1	8434251	8434750	ID_41
chr1	8787751	8788000	ID_42
chr1	8799501	8799750	ID_43
chr1	8974751	8975000	ID_44
chr1	9099501	9099750	ID_45
chr1	9176751	9177000	ID_46
chr1	9297251	9297500	ID_47
chr1	9322251	9322500	ID_48
chr1	9365001	9365250	ID_49
chr1	9568001	9568250	ID_50
chr1	9610001	9610250	ID_51
chr1	9659751	9660000	ID_52
chr1	9881501	9881750	ID_53
chr1	10013251	10013750	ID_54
chr1	10444751	10445000	ID_55
chr1	10540751	10541000	ID_56
chr1	10735751	10736000	ID_57
chr1	10842751	10843000	ID_58
chr1	10993751	10994000	ID_59
chr1	11026501	11026750	ID_60
chr1	11083501	11083750	ID_61
chr1	11202501	11202750	ID_62
chr1	11294251	11294500	ID_63
chr1	11329251	11329750	ID_64
chr1	11341501	11341750	ID_65
chr1	11414001	11414500	ID_66
chr1	11473501	11473750	ID_67
chr1	11613251	11613500	ID_68
chr1	11661501	11661750	ID_69
chr1	11673751	11674250	ID_70
chr1	11714001	11714250	ID_71
chr1	11824251	11824500	ID_72
chr1	11929501	11929750	ID_73
chr1	11945501	11946000	ID_74
chr1	11978501	11978750	ID_75
chr1	12059751	12060000	ID_76
chr1	12118501	12118750	ID_77
chr1	12351751	12352000	ID_78
chr1	12424251	12424750	ID_79
chr1	12739251	12739500	ID_80
chr1	12746501	12746750	ID_81
chr1	12785751	12786000	ID_82
chr1	12865251	12865750	ID_83
chr1	12885251	12885500	ID_84
chr1	12907501	12908000	ID_85
chr1	13118251	13119000	ID_86
chr1	13240751	13241000	ID_87
chr1	13288001	13288500	ID_88
chr1	13320251	13320500	ID_89
chr1	13357001	13357500	ID_90
chr1	13471251	13471500	ID_91
chr1	13600501	13600750	ID_92
chr1	13807251	13807500	ID_93
chr1	13843751	13844000	ID_94
chr1	13903251	13903750	ID_95
chr1	14076001	14076250	ID_96
chr1	14085001	14085500	ID_97
chr1	14125001	14125250	ID_98
chr1	14183001	14183500	ID_99
chr1	14200751	14201000	ID_100
chr1	14427751	14428000	ID_101
chr1	14453501	14454000	ID_102
chr1	14482251	14482750	ID_103
chr1	14688501	14688750	ID_104
chr1	14755001	14755750	ID_105
chr1	14856501	14856750	ID_106
chr1	14934751	14935000	ID_107
chr1	14975251	14975500	ID_108
chr1	15234001	15234250	ID_109
chr1	15264001	15264500	ID_110
chr1	15265751	15266000	ID_111
chr1	15601001	15601250	ID_112
chr1	15696001	15696500	ID_113
chr1	15883501	15884000	ID_114
chr1	15886251	15886750	ID_115
chr1	15953251	15953500	ID_116
chr1	16109501	16109750	ID_117
chr1	16154501	16154750	ID_118
chr1	16229251	16230000	ID_119
chr1	16240751	16241250	ID_120
chr1	16248001	16248250	ID_121
chr1	16281251	16281500	ID_122
chr1	16282001	16282250	ID_123
chr1	16379501	16379750	ID_124
chr1	16397751	16398000	ID_125
chr1	16518501	16518750	ID_126
chr1	16678751	16679000	ID_127
chr1	16686501	16686750	ID_128
chr1	16798251	16798500	ID_129
chr1	17046501	17046750	ID_130
chr1	17091501	17092000	ID_131
chr1	17481251	17481500	ID_132
chr1	17691501	17691750	ID_133
chr1	17780001	17780250	ID_134
chr1	17882751	17883000	ID_135
chr1	17922251	17922750	ID_136
chr1	18058251	18058750	ID_137
chr1	18193001	18193250	ID_138
chr1	18503251	18503500	ID_139
chr1	18520751	18521000	ID_140
chr1	18704501	18704750	ID_141
chr1	18872251	18872500	ID_142
chr1	18961501	18961750	ID_143
chr1	19127001	19127500	ID_144
chr1	19207501	19207750	ID_145
chr1	19297501	19297750	ID_146
chr1	19359251	19359500	ID_147
chr1	19429501	19429750	ID_148
chr1	19447251	19447500	ID_149
chr1	19485501	19485750	ID_150
chr1	19681251	19681500	ID_151
chr1	19709501	19709750	ID_152
chr1	19722001	19722250	ID_153
chr1	19761001	19761500	ID_154
chr1	19774751	19775000	ID_155
chr1	19799001	19799250	ID_156
chr1	19999251	19999500	ID_157
chr1	20008251	20008500	ID_158
chr1	20307501	20307750	ID_159
chr1	20310501	20310750	ID_160
chr1	20392501	20392750	ID_161
chr1	20475001	20475250	ID_162
chr1	20493251	20493750	ID_163
chr1	20574501	20574750	ID_164
chr1	20628251	20628500	ID_165
chr1	20896501	20896750	ID_166
chr1	20909251	20909500	ID_167
chr1	20931251	20931500	ID_168
chr1	20956001	20956250	ID_169
chr1	20984501	20984750	ID_170
chr1	21077251	21077500	ID_171
chr1	21144251	21144500	ID_172
chr1	21195751	21196000	ID_173
chr1	21214001	21214500	ID_174
chr1	21233251	21233750	ID_175
chr1	21301751	21302000	ID_176
chr1	21337001	21337250	ID_177
chr1	21473251	21473500	ID_178
chr1	21730751	21731000	ID_179
chr1	21812751	21813250	ID_180
chr1	21827751	21828000	ID_181
chr1	22212251	22212500	ID_182
chr1	22234001	22234250	ID_183
chr1	22234751	22235000	ID_184
chr1	22381501	22381750	ID_185
chr1	22468501	22468750	ID_186
chr1	22534001	22534250	ID_187
chr1	22574501	22574750	ID_188
chr1	22597501	22598000	ID_189
chr1	22617001	22617250	ID_190
chr1	22740501	22740750	ID_191
chr1	22750751	22751250	ID_192
chr1	22838751	22839000	ID_193
chr1	23096751	23097000	ID_194
chr1	23102001	23102250	ID_195
chr1	23230251	23230500	ID_196
chr1	23340251	23340500	ID_197
chr1	23434751	23435000	ID_198
chr1	23506751	23507000	ID_199
chr1	23785501	23785750	ID_200
chr1	23839751	23840000	ID_201
chr1	23954251	23954500	ID_202
chr1	24099501	24099750	ID_203
chr1	24140251	24140500	ID_204
chr1	24187001	24187500	ID_205
chr1	24237501	24237750	ID_206
chr1	24309251	24309500	ID_207
chr1	24381751	24382000	ID_208
chr1	24563251	24563500	ID_209
chr1	24611751	24612000	ID_210
chr1	24612751	24613000	ID_211
chr1	24613501	24613750	ID_212
chr1	24652501	24653000	ID_213
chr1	24771501	24771750	ID_214
chr1	24807501	24807750	ID_215
chr1	24811751	24812250	ID_216
chr1	24835001	24835250	ID_217
chr1	24865501	24865750	ID_218
chr1	24998501	24998750	ID_219
chr1	25040251	25040500	ID_220
chr1	25046751	25047000	ID_221
chr1	25173001	25173250	ID_222
chr1	25178251	25179000	ID_223
chr1	25228501	25229000	ID_224
chr1	25230751	25231250	ID_225
chr1	25299751	25300000	ID_226
chr1	25448751	25449000	ID_227
chr1	25517251	25517500	ID_228
chr1	25639501	25639750	ID_229
chr1	25663751	25664000	ID_230
chr1	25835501	25836000	ID_231
chr1	25859751	25860250	ID_232
chr1	25994751	25995000	ID_233
chr1	25995751	25996000	ID_234
chr1	26011001	26011500	ID_235
chr1	26115751	26116000	ID_236
chr1	26180751	26181000	ID_237
chr1	26238501	26238750	ID_238
chr1	26333751	26334000	ID_239
chr1	26557001	26557250	ID_240
chr1	26605251	26605500	ID_241
chr1	26608251	26608500	ID_242
chr1	26819251	26819500	ID_243
chr1	26867001	26867250	ID_244
chr1	26889501	26889750	ID_245
chr1	27109751	27110000	ID_246
chr1	27159501	27159750	ID_247
chr1	27276251	27276500	ID_248
chr1	27592251	27592750	ID_249
chr1	27779001	27779250	ID_250
chr1	27919751	27920000	ID_251
chr1	28086251	28086500	ID_252
chr1	28117251	28117500	ID_253
chr1	28148001	28148250	ID_254
chr1	28176751	28177000	ID_255
chr1	28396501	28396750	ID_256
chr1	28556501	28556750	ID_257
chr1	28886001	28886250	ID_258
chr1	28967751	28968000	ID_259
chr1	29097251	29097500	ID_260
chr1	29179501	29179750	ID_261
chr1	29607251	29607500	ID_262
chr1	29618251	29618500	ID_263
chr1	29693001	29693250	ID_264
chr1	30066751	30067250	ID_265
chr1	30282751	30283000	ID_266
chr1	30542001	30542250	ID_267
chr1	30643251	30643500	ID_268
chr1	30666501	30666750	ID_269
chr1	30805751	30806250	ID_270
chr1	30834501	30834750	ID_271
chr1	30841751	30842250	ID_272
chr1	30924501	30924750	ID_273
chr1	30961751	30962000	ID_274
chr1	31142251	31142500	ID_275
chr1	31510001	31510250	ID_276
chr1	31734251	31734500	ID_277
chr1	31858751	31859000	ID_278
chr1	32073751	32074250	ID_279
chr1	32172501	32172750	ID_280
chr1	32503251	32503500	ID_281
chr1	32845501	32845750	ID_282
chr1	32971501	32971750	ID_283
chr1	32978001	32978250	ID_284
chr1	33045751	33046000	ID_285
chr1	33114501	33114750	ID_286
chr1	33243001	33243250	ID_287
chr1	33332251	33332500	ID_288
chr1	33372251	33372500	ID_289
chr1	33386251	33386500	ID_290
chr1	33394751	33395250	ID_291
chr1	33409751	33410000	ID_292
chr1	33415501	33416000	ID_293
chr1	33466001	33466250	ID_294
chr1	33500001	33500250	ID_295
chr1	33502751	33503000	ID_296
chr1	33640501	33640750	ID_297
chr1	33697001	33697250	ID_298
chr1	33724251	33724500	ID_299
chr1	33733251	33733500	ID_300
chr1	33759501	33759750	ID_301
chr1	33839001	33839250	ID_302
chr1	33863501	33863750	ID_303
chr1	33889751	33890000	ID_304
chr1	33964751	33965250	ID_305
chr1	34011751	34012000	ID_306
chr1	34088251	34088750	ID_307
chr1	34111251	34112000	ID_308
chr1	34121251	34121500	ID_309
chr1	34140251	34140500	ID_310
chr1	34145501	34145750	ID_311
chr1	34156001	34156500	ID_312
chr1	34197001	34197250	ID_313
chr1	34224001	34224250	ID_314
chr1	34290251	34290500	ID_315
chr1	34391001	34391500	ID_316
chr1	34397751	34398000	ID_317
chr1	34408251	34408500	ID_318
chr1	34417751	34418250	ID_319
chr1	34561501	34561750	ID_320
chr1	34696501	34696750	ID_321
chr1	34743001	34743250	ID_322
chr1	34744751	34745000	ID_323
chr1	34790251	34790500	ID_324
chr1	34812251	34812750	ID_325
chr1	34826251	34826500	ID_326
chr1	35050751	35051250	ID_327
chr1	35197751	35198000	ID_328
chr1	35220251	35220500	ID_329
chr1	35272001	35272250	ID_330
chr1	35390001	35390250	ID_331
chr1	35435751	35436000	ID_332
chr1	35462501	35462750	ID_333
chr1	35518251	35518500	ID_334
chr1	35560751	35561250	ID_335
chr1	35612751	35613250	ID_336
chr1	35656501	35656750	ID_337
chr1	35763501	35763750	ID_338
chr1	35791001	35791250	ID_339
chr1	35874501	35874750	ID_340
chr1	35879501	35879750	ID_341
chr1	35945751	35946000	ID_342
chr1	35995501	35995750	ID_343
chr1	36036251	36036500	ID_344
chr1	36039501	36040000	ID_345
chr1	36072001	36072500	ID_346
chr1	36074501	36074750	ID_347
chr1	36133501	36133750	ID_348
chr1	36182751	36183250	ID_349
chr1	36203751	36204250	ID_350
chr1	36356001	36356250	ID_351
chr1	36432501	36432750	ID_352
chr1	36499751	36500000	ID_353
chr1	36523251	36523500	ID_354
chr1	36555501	36555750	ID_355
chr1	36559501	36559750	ID_356
chr1	36628251	36628500	ID_357
chr1	36631001	36631250	ID_358
chr1	36799251	36799500	ID_359
chr1	36875001	36875500	ID_360
chr1	36896251	36896750	ID_361
chr1	36962751	36963000	ID_362
chr1	36982751	36983000	ID_363
chr1	36988001	36988250	ID_364
chr1	37027251	37027500	ID_365
chr1	37104751	37105000	ID_366
chr1	37110251	37110500	ID_367
chr1	37143501	37143750	ID_368
chr1	37167001	37167500	ID_369
chr1	37177501	37177750	ID_370
chr1	37347251	37347750	ID_371
chr1	37351001	37351250	ID_372
chr1	37391501	37392000	ID_373
chr1	37415251	37415500	ID_374
chr1	37464501	37464750	ID_375
chr1	37491251	37491500	ID_376
chr1	37496251	37496500	ID_377
chr1	37529001	37529250	ID_378
chr1	37537751	37538000	ID_379
chr1	37539501	37539750	ID_380
chr1	37572501	37573000	ID_381
chr1	37593251	37593500	ID_382
chr1	37717251	37717750	ID_383
chr1	37720751	37721000	ID_384
chr1	37837751	37838000	ID_385
chr1	37838501	37838750	ID_386
chr1	37909751	37910250	ID_387
chr1	37931751	37932000	ID_388
chr1	37992751	37993000	ID_389
chr1	38051751	38052250	ID_390
chr1	38132501	38132750	ID_391
chr1	38158251	38158500	ID_392
chr1	38187751	38188000	ID_393
chr1	38239251	38239500	ID_394
chr1	38252751	38253250	ID_395
chr1	38398001	38398250	ID_396
chr1	38567251	38567750	ID_397
chr1	38589751	38590000	ID_398
chr1	38618501	38618750	ID_399
chr1	38654251	38654500	ID_400
chr1	38661251	38661750	ID_401
chr1	38664001	38664500	ID_402
chr1	38822251	38822500	ID_403
chr1	38913001	38913250	ID_404
chr1	39012251	39012500	ID_405
chr1	39157251	39157500	ID_406
chr1	39219501	39219750	ID_407
chr1	39220751	39221000	ID_408
chr1	39236001	39236500	ID_409
chr1	39276751	39277000	ID_410
chr1	39279251	39279500	ID_411
chr1	39288501	39288750	ID_412
chr1	39399001	39399250	ID_413
chr1	39410001	39410250	ID_414
chr1	39455751	39456000	ID_415
chr1	39460751	39461000	ID_416
chr1	39489001	39489250	ID_417
chr1	39671751	39672000	ID_418
chr1	39680501	39680750	ID_419
chr1	39701251	39701500	ID_420
chr1	39779501	39779750	ID_421
chr1	39863751	39864000	ID_422
chr1	39958501	39958750	ID_423
chr1	39963251	39963500	ID_424
chr1	40012751	40013000	ID_425
chr1	40055001	40055500	ID_426
chr1	40071251	40071500	ID_427
chr1	40082001	40082250	ID_428
chr1	40083001	40083250	ID_429
chr1	40134251	40134500	ID_430
chr1	40149251	40149500	ID_431
chr1	40157751	40158250	ID_432
chr1	40183001	40183250	ID_433
chr1	40580251	40580500	ID_434
chr1	40613251	40613500	ID_435
chr1	40617251	40617500	ID_436
chr1	40765501	40766000	ID_437
chr1	40897501	40898000	ID_438
chr1	41049001	41049250	ID_439
chr1	41104251	41104500	ID_440
chr1	41177251	41177500	ID_441
chr1	41406501	41406750	ID_442
chr1	41524751	41525000	ID_443
chr1	41744001	41744250	ID_444
chr1	41766501	41766750	ID_445
chr1	41912751	41913000	ID_446
chr1	42019501	42019750	ID_447
chr1	42061001	42061500	ID_448
chr1	42071251	42071500	ID_449
chr1	42210001	42210250	ID_450
chr1	42243501	42243750	ID_451
chr1	42256751	42257000	ID_452
chr1	42547501	42547750	ID_453
chr1	42559751	42560000	ID_454
chr1	42581001	42581250	ID_455
chr1	42660501	42660750	ID_456
chr1	42672501	42672750	ID_457
chr1	42684501	42684750	ID_458
chr1	42691251	42691500	ID_459
chr1	42705001	42705250	ID_460
chr1	42741501	42741750	ID_461
chr1	42812751	42813250	ID_462
chr1	42861751	42862000	ID_463
chr1	42944501	42944750	ID_464
chr1	42949001	42949250	ID_465
chr1	42961001	42961250	ID_466
chr1	43034251	43034500	ID_467
chr1	43186251	43186500	ID_468
chr1	43370251	43370500	ID_469
chr1	43410001	43410250	ID_470
chr1	43432501	43432750	ID_471
chr1	43452501	43452750	ID_472
chr1	43485251	43485750	ID_473
chr1	43506001	43506500	ID_474
chr1	43615001	43615250	ID_475
chr1	43658251	43658750	ID_476
chr1	43675751	43676250	ID_477
chr1	43904251	43904500	ID_478
chr1	44000001	44000250	ID_479
chr1	44076251	44076750	ID_480
chr1	44155251	44155750	ID_481
chr1	44307751	44308000	ID_482
chr1	44384501	44384750	ID_483
chr1	44448751	44449250	ID_484
chr1	44481251	44481500	ID_485
chr1	44596501	44596750	ID_486
chr1	44680751	44681000	ID_487
chr1	44719251	44719500	ID_488
chr1	44887001	44887250	ID_489
chr1	45405501	45405750	ID_490
chr1	45678001	45678250	ID_491
chr1	45706251	45706500	ID_492
chr1	45838001	45838250	ID_493
chr1	45941251	45941500	ID_494
chr1	45952251	45952750	ID_495
chr1	45968751	45969000	ID_496
chr1	46118001	46118250	ID_497
chr1	46313751	46314000	ID_498
chr1	46319501	46319750	ID_499
chr1	46373501	46373750	ID_500
chr1	46465751	46466000	ID_501
chr1	46704251	46704500	ID_502
chr1	46845501	46845750	ID_503
chr1	46867251	46867500	ID_504
chr1	47068751	47069250	ID_505
chr1	47082501	47082750	ID_506
chr1	47126751	47127250	ID_507
chr1	47130501	47130750	ID_508
chr1	47149251	47149500	ID_509
chr1	47321501	47322000	ID_510
chr1	47661751	47662000	ID_511
chr1	47930251	47930500	ID_512
chr1	48057001	48057250	ID_513
chr1	48105501	48105750	ID_514
chr1	48132501	48132750	ID_515
chr1	48197251	48197500	ID_516
chr1	48343751	48344000	ID_517
chr1	48421251	48421500	ID_518
chr1	48619751	48620000	ID_519
chr1	48703751	48704000	ID_520
chr1	48798001	48798250	ID_521
chr1	48801251	48801500	ID_522
chr1	48832251	48832500	ID_523
chr1	49145501	49146000	ID_524
chr1	49445751	49446000	ID_525
chr1	49591501	49591750	ID_526
chr1	49649501	49649750	ID_527
chr1	49676751	49677000	ID_528
chr1	49806001	49806250	ID_529
chr1	49997501	49997750	ID_530
chr1	50178501	50178750	ID_531
chr1	50237251	50237500	ID_532
chr1	50277001	50277250	ID_533
chr1	50398251	50398750	ID_534
chr1	50532751	50533250	ID_535
chr1	51113001	51113250	ID_536
chr1	51140251	51140500	ID_537
chr1	51164501	51164750	ID_538
chr1	51187501	51187750	ID_539
chr1	51224751	51225000	ID_540
chr1	51249501	51249750	ID_541
chr1	51265751	51266000	ID_542
chr1	51530251	51530750	ID_543
chr1	51545501	51545750	ID_544
chr1	51797251	51797500	ID_545
chr1	51851001	51851250	ID_546
chr1	51853251	51854000	ID_547
chr1	51893751	51894250	ID_548
chr1	51913251	51913500	ID_549
chr1	51917751	51918000	ID_550
chr1	51930501	51930750	ID_551
chr1	51967251	51967500	ID_552
chr1	52100501	52100750	ID_553
chr1	52107251	52107500	ID_554
chr1	52113001	52113250	ID_555
chr1	52121751	52122000	ID_556
chr1	52122251	52122750	ID_557
chr1	52144251	52144500	ID_558
chr1	52147751	52148250	ID_559
chr1	52166751	52167000	ID_560
chr1	52223251	52223500	ID_561
chr1	52248501	52248750	ID_562
chr1	52256751	52257000	ID_563
chr1	52288001	52288250	ID_564
chr1	52307001	52307250	ID_565
chr1	52354251	52354500	ID_566
chr1	52403751	52404000	ID_567
chr1	52515251	52515500	ID_568
chr1	52618001	52618250	ID_569
chr1	52683751	52684000	ID_570
chr1	52806501	52806750	ID_571
chr1	52918001	52918250	ID_572
chr1	53276751	53277000	ID_573
chr1	53338751	53339000	ID_574
chr1	53347501	53347750	ID_575
chr1	53439251	53439500	ID_576
chr1	53457751	53458000	ID_577
chr1	53531001	53531500	ID_578
chr1	53533751	53534000	ID_579
chr1	53549001	53549250	ID_580
chr1	53579751	53580000	ID_581
chr1	53591001	53591250	ID_582
chr1	53617501	53617750	ID_583
chr1	53706251	53706750	ID_584
chr1	53907501	53907750	ID_585
chr1	53913501	53913750	ID_586
chr1	53925501	53925750	ID_587
chr1	54028751	54029000	ID_588
chr1	54037501	54037750	ID_589
chr1	54211501	54211750	ID_590
chr1	54247251	54247500	ID_591
chr1	54336501	54336750	ID_592
chr1	54374001	54374250	ID_593
chr1	54391751	54392000	ID_594
chr1	54424501	54424750	ID_595
chr1	54500751	54501000	ID_596
chr1	54647501	54648000	ID_597
chr1	54690251	54690750	ID_598
chr1	54746001	54746250	ID_599
chr1	54754251	54754750	ID_600
chr1	54758751	54759000	ID_601
chr1	54801251	54801750	ID_602
chr1	54835251	54835500	ID_603
chr1	54840251	54840750	ID_604
chr1	55003501	55004000	ID_605
chr1	55135001	55135250	ID_606
chr1	55155751	55156000	ID_607
chr1	55203001	55203250	ID_608
chr1	55444751	55445000	ID_609
chr1	55467251	55467750	ID_610
chr1	55493001	55493250	ID_611
chr1	55660501	55660750	ID_612
chr1	55711751	55712000	ID_613
chr1	55736001	55736500	ID_614
chr1	55740251	55740500	ID_615
chr1	55792751	55793000	ID_616
chr1	55831251	55831500	ID_617
chr1	55934001	55934250	ID_618
chr1	56043001	56043250	ID_619
chr1	56143001	56143250	ID_620
chr1	56154501	56154750	ID_621
chr1	56367001	56367250	ID_622
chr1	56460251	56460500	ID_623
chr1	56460751	56461000	ID_624
chr1	56655501	56655750	ID_625
chr1	56715751	56716000	ID_626
chr1	56794251	56794750	ID_627
chr1	56893251	56893500	ID_628
chr1	56934501	56934750	ID_629
chr1	56974251	56974750	ID_630
chr1	56975751	56977250	ID_631
chr1	56977501	56978000	ID_632
chr1	56988751	56989000	ID_633
chr1	56989251	56989500	ID_634
chr1	57115751	57116000	ID_635
chr1	57158751	57159000	ID_636
chr1	57208251	57208500	ID_637
chr1	57335251	57335500	ID_638
chr1	57373751	57374000	ID_639
chr1	57392501	57392750	ID_640
chr1	57403501	57403750	ID_641
chr1	57514501	57514750	ID_642
chr1	57546001	57546500	ID_643
chr1	57614001	57614250	ID_644
chr1	57697751	57698000	ID_645
chr1	57759001	57759500	ID_646
chr1	57765751	57766000	ID_647
chr1	57766751	57767000	ID_648
chr1	57773251	57773500	ID_649
chr1	57805751	57806000	ID_650
chr1	57870251	57870750	ID_651
chr1	57971251	57971500	ID_652
chr1	58053251	58053500	ID_653
chr1	58083751	58084000	ID_654
chr1	58216751	58217000	ID_655
chr1	58348501	58348750	ID_656
chr1	58432251	58432500	ID_657
chr1	58449751	58450000	ID_658
chr1	58540001	58540250	ID_659
chr1	58741751	58742000	ID_660
chr1	58743001	58743500	ID_661
chr1	58758751	58759000	ID_662
chr1	58775251	58775500	ID_663
chr1	58849251	58849500	ID_664
chr1	58970001	58970250	ID_665
chr1	59030001	59030250	ID_666
chr1	59032751	59033250	ID_667
chr1	59101251	59101500	ID_668
chr1	59109001	59109250	ID_669
chr1	59163001	59163500	ID_670
chr1	59285751	59286000	ID_671
chr1	59431501	59431750	ID_672
chr1	59455251	59455500	ID_673
chr1	59468751	59469000	ID_674
chr1	59529501	59529750	ID_675
chr1	59533001	59533500	ID_676
chr1	59534751	59535000	ID_677
chr1	59576501	59576750	ID_678
chr1	59580751	59581000	ID_679
chr1	59730251	59730500	ID_680
chr1	59759251	59759500	ID_681
chr1	59947501	59947750	ID_682
chr1	60073501	60073750	ID_683
chr1	60298251	60298500	ID_684
chr1	60498751	60499000	ID_685
chr1	60543501	60543750	ID_686
chr1	60960501	60961250	ID_687
chr1	60971501	60972250	ID_688
chr1	61226751	61227000	ID_689
chr1	61307251	61307500	ID_690
chr1	61498251	61498500	ID_691
chr1	61514251	61514500	ID_692
chr1	61571001	61571250	ID_693
chr1	61744001	61744250	ID_694
chr1	61846251	61846500	ID_695
chr1	62041501	62042000	ID_696
chr1	62050501	62050750	ID_697
chr1	62062751	62063000	ID_698
chr1	62083751	62084000	ID_699
chr1	62223501	62223750	ID_700
chr1	62304251	62304500	ID_701
chr1	62357501	62358250	ID_702
chr1	62513001	62513500	ID_703
chr1	62518501	62519000	ID_704
chr1	62547501	62547750	ID_705
chr1	62764251	62764500	ID_706
chr1	62767501	62767750	ID_707
chr1	62771001	62771250	ID_708
chr1	62772251	62772500	ID_709
chr1	62794501	62795250	ID_710
chr1	62799751	62800000	ID_711
chr1	62869751	62870000	ID_712
chr1	62873251	62873750	ID_713
chr1	62877501	62877750	ID_714
chr1	62926001	62926250	ID_715
chr1	62956751	62957000	ID_716
chr1	63143251	63143500	ID_717
chr1	63190751	63191250	ID_718
chr1	63248251	63248500	ID_719
chr1	63457001	63457250	ID_720
chr1	63528251	63528500	ID_721
chr1	63576001	63576250	ID_722
chr1	63597001	63597250	ID_723
chr1	63654251	63654500	ID_724
chr1	63663751	63664000	ID_725
chr1	63709251	63709500	ID_726
chr1	63744501	63744750	ID_727
chr1	63829501	63829750	ID_728
chr1	63886001	63886500	ID_729
chr1	63887001	63887250	ID_730
chr1	63919751	63920250	ID_731
chr1	63948001	63948250	ID_732
chr1	64005001	64005500	ID_733
chr1	64013251	64013500	ID_734
chr1	64055751	64056000	ID_735
chr1	64108001	64108250	ID_736
chr1	64165001	64165250	ID_737
chr1	64208001	64208250	ID_738
chr1	64308751	64309000	ID_739
chr1	64319501	64319750	ID_740
chr1	64450751	64451000	ID_741
chr1	64604501	64604750	ID_742
chr1	64609751	64610250	ID_743
chr1	64614501	64614750	ID_744
chr1	64886501	64886750	ID_745
chr1	64896001	64896500	ID_746
chr1	65059251	65059500	ID_747
chr1	65082251	65082500	ID_748
chr1	65088751	65089000	ID_749
chr1	65138501	65138750	ID_750
chr1	65146001	65146250	ID_751
chr1	65189001	65189250	ID_752
chr1	65439001	65439250	ID_753
chr1	65523501	65523750	ID_754
chr1	65705251	65705500	ID_755
chr1	65771251	65771500	ID_756
chr1	65779751	65780250	ID_757
chr1	65904501	65904750	ID_758
chr1	66065501	66065750	ID_759
chr1	66251251	66251500	ID_760
chr1	66277501	66277750	ID_761
chr1	66657251	66657500	ID_762
chr1	66709251	66709500	ID_763
chr1	66960501	66960750	ID_764
chr1	67001001	67001250	ID_765
chr1	67002001	67002500	ID_766
chr1	67368251	67368500	ID_767
chr1	67470751	67471000	ID_768
chr1	67606001	67606250	ID_769
chr1	67774001	67774250	ID_770
chr1	67828001	67828250	ID_771
chr1	67865251	67865500	ID_772
chr1	67878251	67878500	ID_773
chr1	68040251	68040500	ID_774
chr1	68138001	68138250	ID_775
chr1	68264251	68264500	ID_776
chr1	68380751	68381000	ID_777
chr1	68524001	68524500	ID_778
chr1	68720001	68720250	ID_779
chr1	68746251	68746500	ID_780
chr1	69062751	69063000	ID_781
chr1	69085501	69085750	ID_782
chr1	69187001	69187250	ID_783
chr1	69235751	69236000	ID_784
chr1	69281501	69281750	ID_785
chr1	69291001	69291250	ID_786
chr1	69301501	69301750	ID_787
chr1	69406001	69406250	ID_788
chr1	69593501	69594000	ID_789
chr1	69610001	69610250	ID_790
chr1	69720001	69720250	ID_791
chr1	69752001	69752250	ID_792
chr1	69955001	69955250	ID_793
chr1	70131751	70132000	ID_794
chr1	70285001	70285250	ID_795
chr1	70440751	70441000	ID_796
chr1	70657001	70657250	ID_797
chr1	70789751	70790000	ID_798
chr1	71000251	71000500	ID_799
chr1	71007751	71008000	ID_800
chr1	71139001	71139250	ID_801
chr1	71327251	71327500	ID_802
chr1	71487501	71487750	ID_803
chr1	71562251	71562500	ID_804
chr1	71605251	71605500	ID_805
chr1	71609251	71609500	ID_806
chr1	71619251	71619750	ID_807
chr1	71640501	71640750	ID_808
chr1	71642251	71642500	ID_809
chr1	71674751	71675000	ID_810
chr1	71680501	71681000	ID_811
chr1	71700501	71700750	ID_812
chr1	71720251	71720750	ID_813
chr1	71756001	71756250	ID_814
chr1	71979751	71980000	ID_815
chr1	71995001	71995500	ID_816
chr1	72065001	72065500	ID_817
chr1	72078751	72079250	ID_818
chr1	72115001	72115250	ID_819
chr1	72207501	72207750	ID_820
chr1	72244251	72244750	ID_821
chr1	72255751	72256000	ID_822
chr1	72268751	72269000	ID_823
chr1	72321501	72321750	ID_824
chr1	72453501	72453750	ID_825
chr1	72524251	72524500	ID_826
chr1	72555251	72555500	ID_827
chr1	72579501	72580000	ID_828
chr1	72596501	72596750	ID_829
chr1	72745251	72745500	ID_830
chr1	72783001	72783250	ID_831
chr1	72822751	72823000	ID_832
chr1	72880501	72880750	ID_833
chr1	73046751	73047000	ID_834
chr1	73135001	73135250	ID_835
chr1	73324251	73324750	ID_836
chr1	73434001	73434250	ID_837
chr1	73507251	73507500	ID_838
chr1	73522251	73522500	ID_839
chr1	73632501	73632750	ID_840
chr1	73650751	73651000	ID_841
chr1	73697251	73697750	ID_842
chr1	73761751	73762000	ID_843
chr1	73805251	73805750	ID_844
chr1	73823751	73824250	ID_845
chr1	73848251	73848500	ID_846
chr1	73850751	73851250	ID_847
chr1	73854001	73854250	ID_848
chr1	73925501	73925750	ID_849
chr1	73978751	73979250	ID_850
chr1	74030751	74031000	ID_851
chr1	74060001	74060250	ID_852
chr1	74081251	74081500	ID_853
chr1	74175251	74175500	ID_854
chr1	74185251	74185500	ID_855
chr1	74281751	74282000	ID_856
chr1	74330251	74330500	ID_857
chr1	74366001	74366250	ID_858
chr1	74398501	74399000	ID_859
chr1	74428001	74428250	ID_860
chr1	74430251	74430500	ID_861
chr1	74503251	74503500	ID_862
chr1	74524751	74525000	ID_863
chr1	74536751	74537000	ID_864
chr1	74625001	74625250	ID_865
chr1	74684501	74684750	ID_866
chr1	74732501	74732750	ID_867
chr1	74794001	74794250	ID_868
chr1	74894251	74894500	ID_869
chr1	74902001	74902250	ID_870
chr1	74954751	74955500	ID_871
chr1	74960001	74960250	ID_872
chr1	74973001	74973250	ID_873
chr1	75040001	75040250	ID_874
chr1	75173501	75173750	ID_875
chr1	75185751	75186000	ID_876
chr1	75209251	75209500	ID_877
chr1	75300501	75300750	ID_878
chr1	75375001	75375750	ID_879
chr1	75383501	75383750	ID_880
chr1	75394001	75394250	ID_881
chr1	75421751	75422250	ID_882
chr1	75431251	75431500	ID_883
chr1	75482751	75483250	ID_884
chr1	75486251	75486500	ID_885
chr1	75519751	75520000	ID_886
chr1	75529751	75530250	ID_887
chr1	75549251	75549500	ID_888
chr1	75564251	75564500	ID_889
chr1	75727501	75727750	ID_890
chr1	75775501	75775750	ID_891
chr1	75791751	75792000	ID_892
chr1	76028501	76029000	ID_893
chr1	76078251	76078500	ID_894
chr1	76121501	76121750	ID_895
chr1	76328751	76329000	ID_896
chr1	76444751	76445000	ID_897
chr1	76460001	76460250	ID_898
chr1	76546251	76546750	ID_899
chr1	76586001	76586250	ID_900
chr1	76799001	76799250	ID_901
chr1	76918001	76918250	ID_902
chr1	76986001	76986500	ID_903
chr1	77064001	77064250	ID_904
chr1	77076751	77077000	ID_905
chr1	77360501	77360750	ID_906
chr1	77424751	77425000	ID_907
chr1	77512501	77513000	ID_908
chr1	77600001	77600250	ID_909
chr1	77603501	77603750	ID_910
chr1	77699501	77699750	ID_911
chr1	77722501	77723250	ID_912
chr1	77769001	77769250	ID_913
chr1	77844251	77844500	ID_914
chr1	78058751	78059000	ID_915
chr1	78087251	78087500	ID_916
chr1	78171251	78171500	ID_917
chr1	78242501	78242750	ID_918
chr1	78251001	78251250	ID_919
chr1	78312501	78312750	ID_920
chr1	78341001	78341500	ID_921
chr1	78350751	78351000	ID_922
chr1	78422001	78422250	ID_923
chr1	78446001	78446250	ID_924
chr1	78462751	78463000	ID_925
chr1	78583251	78583500	ID_926
chr1	78604251	78604500	ID_927
chr1	78614501	78615000	ID_928
chr1	78647001	78647500	ID_929
chr1	78662501	78662750	ID_930
chr1	78674001	78674250	ID_931
chr1	78705001	78705250	ID_932
chr1	78731751	78732000	ID_933
chr1	78748001	78748250	ID_934
chr1	78895501	78895750	ID_935
chr1	78903251	78903500	ID_936
chr1	78906751	78907250	ID_937
chr1	78989251	78989500	ID_938
chr1	79032751	79033000	ID_939
chr1	79248001	79248250	ID_940
chr1	79299501	79299750	ID_941
chr1	79312751	79313000	ID_942
chr1	79344501	79344750	ID_943
chr1	79565251	79565500	ID_944
chr1	79621501	79621750	ID_945
chr1	79825251	79825500	ID_946
chr1	79829001	79829500	ID_947
chr1	80015501	80016000	ID_948
chr1	80111251	80111750	ID_949
chr1	80227251	80227750	ID_950
chr1	80407751	80408000	ID_951
chr1	80526751	80527000	ID_952
chr1	80533751	80534000	ID_953
chr1	80694001	80694250	ID_954
chr1	80718501	80718750	ID_955
chr1	80850751	80851000	ID_956
chr1	81036501	81036750	ID_957
chr1	81198501	81198750	ID_958
chr1	81216001	81216250	ID_959
chr1	81333251	81333500	ID_960
chr1	81568001	81568250	ID_961
chr1	81606751	81607000	ID_962
chr1	81644251	81644500	ID_963
chr1	81661251	81661500	ID_964
chr1	81717251	81717500	ID_965
chr1	81729001	81729500	ID_966
chr1	81774751	81775000	ID_967
chr1	81980751	81981250	ID_968
chr1	81985001	81985250	ID_969
chr1	82066251	82066500	ID_970
chr1	82323001	82323250	ID_971
chr1	82412501	82412750	ID_972
chr1	82445501	82445750	ID_973
chr1	82476751	82477000	ID_974
chr1	82571501	82572000	ID_975
chr1	82604501	82604750	ID_976
chr1	82665251	82665500	ID_977
chr1	82870751	82871000	ID_978
chr1	82931001	82931500	ID_979
chr1	82946251	82946750	ID_980
chr1	82960501	82960750	ID_981
chr1	83007501	83008000	ID_982
chr1	83032751	83033000	ID_983
chr1	83037001	83037250	ID_984
chr1	83045501	83045750	ID_985
chr1	83046251	83046500	ID_986
chr1	83061001	83061250	ID_987
chr1	83076001	83076250	ID_988
chr1	83191251	83191500	ID_989
chr1	83231501	83231750	ID_990
chr1	83243251	83243500	ID_991
chr1	83252501	83253000	ID_992
chr1	83363251	83363500	ID_993
chr1	83461251	83461500	ID_994
chr1	83682751	83683000	ID_995
chr1	83823501	83823750	ID_996
chr1	83841251	83841500	ID_997
chr1	83895751	83896000	ID_998
chr1	84166501	84166750	ID_999
chr1	84322001	84322500	ID_1000
chr1	84336751	84337000	ID_1001
chr1	84417501	84417750	ID_1002
chr1	84539001	84539250	ID_1003
chr1	84607751	84608000	ID_1004
chr1	84621751	84622000	ID_1005
chr1	84626251	84626500	ID_1006
chr1	84789251	84789500	ID_1007
chr1	84802001	84802250	ID_1008
chr1	84816251	84816500	ID_1009
chr1	84873251	84873500	ID_1010
chr1	85059001	85059250	ID_1011
chr1	85144001	85144250	ID_1012
chr1	85176251	85176750	ID_1013
chr1	85237751	85238000	ID_1014
chr1	85248751	85249250	ID_1015
chr1	85280501	85281000	ID_1016
chr1	85317501	85317750	ID_1017
chr1	85326251	85326500	ID_1018
chr1	85475501	85476000	ID_1019
chr1	85489251	85489500	ID_1020
chr1	85552751	85553000	ID_1021
chr1	85581501	85581750	ID_1022
chr1	85585251	85585750	ID_1023
chr1	85591251	85591500	ID_1024
chr1	85593251	85593500	ID_1025
chr1	85619751	85620000	ID_1026
chr1	85643501	85643750	ID_1027
chr1	85665751	85666000	ID_1028
chr1	85673251	85673500	ID_1029
chr1	85719501	85719750	ID_1030
chr1	85764501	85764750	ID_1031
chr1	85775001	85775250	ID_1032
chr1	85812501	85812750	ID_1033
chr1	85852001	85852250	ID_1034
chr1	85896751	85897000	ID_1035
chr1	85943501	85943750	ID_1036
chr1	86022001	86022250	ID_1037
chr1	86040001	86040250	ID_1038
chr1	86140501	86140750	ID_1039
chr1	86225251	86225750	ID_1040
chr1	86240501	86241000	ID_1041
chr1	86257001	86257250	ID_1042
chr1	86334751	86335000	ID_1043
chr1	86335751	86336250	ID_1044
chr1	86381501	86381750	ID_1045
chr1	86425001	86425500	ID_1046
chr1	86436251	86436500	ID_1047
chr1	86439751	86440000	ID_1048
chr1	86450001	86450250	ID_1049
chr1	86474501	86474750	ID_1050
chr1	86512251	86512500	ID_1051
chr1	86519751	86520000	ID_1052
chr1	86548251	86548500	ID_1053
chr1	86675501	86675750	ID_1054
chr1	86873001	86873250	ID_1055
chr1	86954751	86955000	ID_1056
chr1	87282001	87282250	ID_1057
chr1	87475251	87475750	ID_1058
chr1	87492501	87493000	ID_1059
chr1	87495001	87495250	ID_1060
chr1	87540501	87540750	ID_1061
chr1	87555251	87555500	ID_1062
chr1	87601251	87601500	ID_1063
chr1	87730251	87730500	ID_1064
chr1	87799251	87799500	ID_1065
chr1	87831251	87831500	ID_1066
chr1	87840251	87840500	ID_1067
chr1	88056751	88057000	ID_1068
chr1	88061501	88061750	ID_1069
chr1	88080751	88081000	ID_1070
chr1	88255751	88256000	ID_1071
chr1	88271501	88272000	ID_1072
chr1	88430501	88430750	ID_1073
chr1	88470251	88470500	ID_1074
chr1	88474251	88475000	ID_1075
chr1	88526501	88526750	ID_1076
chr1	88560751	88561250	ID_1077
chr1	88568001	88568250	ID_1078
chr1	88605751	88606000	ID_1079
chr1	88651501	88652000	ID_1080
chr1	88686251	88686500	ID_1081
chr1	88700001	88700500	ID_1082
chr1	88709001	88709250	ID_1083
chr1	88746751	88747000	ID_1084
chr1	88761001	88761250	ID_1085
chr1	88774001	88774750	ID_1086
chr1	88795001	88795250	ID_1087
chr1	88800001	88800250	ID_1088
chr1	89069001	89069250	ID_1089
chr1	89121751	89122250	ID_1090
chr1	89124251	89125000	ID_1091
chr1	89131001	89131500	ID_1092
chr1	89133001	89133250	ID_1093
chr1	89134501	89134750	ID_1094
chr1	89155001	89155250	ID_1095
chr1	89251501	89251750	ID_1096
chr1	89303001	89303250	ID_1097
chr1	89390251	89390750	ID_1098
chr1	89452251	89452500	ID_1099
chr1	89508251	89508500	ID_1100
chr1	89513501	89513750	ID_1101
chr1	89528751	89529000	ID_1102
chr1	89541251	89541750	ID_1103
chr1	89581501	89581750	ID_1104
chr1	89668251	89668500	ID_1105
chr1	89754751	89755000	ID_1106
chr1	89755251	89755500	ID_1107
chr1	89772501	89772750	ID_1108
chr1	89788751	89789000	ID_1109
chr1	89798751	89799000	ID_1110
chr1	89838501	89838750	ID_1111
chr1	89932001	89932250	ID_1112
chr1	89955751	89956000	ID_1113
chr1	89981751	89982250	ID_1114
chr1	90029751	90030250	ID_1115
chr1	90116751	90117750	ID_1116
chr1	90152501	90152750	ID_1117
chr1	90184001	90184250	ID_1118
chr1	90369251	90369500	ID_1119
chr1	90418251	90418500	ID_1120
chr1	90422501	90422750	ID_1121
chr1	90440751	90441000	ID_1122
chr1	90456501	90456750	ID_1123
chr1	90474501	90474750	ID_1124
chr1	90490501	90490750	ID_1125
chr1	90628001	90628250	ID_1126
chr1	90645501	90645750	ID_1127
chr1	90707251	90707500	ID_1128
chr1	90751751	90752000	ID_1129
chr1	90766251	90766500	ID_1130
chr1	90789751	90790250	ID_1131
chr1	90801251	90801500	ID_1132
chr1	90831501	90831750	ID_1133
chr1	90834501	90835000	ID_1134
chr1	90922501	90922750	ID_1135
chr1	90955501	90955750	ID_1136
chr1	90975251	90975500	ID_1137
chr1	91008251	91008750	ID_1138
chr1	91010501	91010750	ID_1139
chr1	91018751	91019000	ID_1140
chr1	91022501	91023000	ID_1141
chr1	91038001	91038500	ID_1142
chr1	91061501	91061750	ID_1143
chr1	91133001	91133250	ID_1144
chr1	91161501	91161750	ID_1145
chr1	91340751	91341000	ID_1146
chr1	91354751	91355000	ID_1147
chr1	91373501	91373750	ID_1148
chr1	91412001	91412250	ID_1149
chr1	91435501	91435750	ID_1150
chr1	91451751	91452000	ID_1151
chr1	91463251	91463750	ID_1152
chr1	91505001	91505250	ID_1153
chr1	91507001	91507250	ID_1154
chr1	91534501	91534750	ID_1155
chr1	91544001	91544500	ID_1156
chr1	91566501	91566750	ID_1157
chr1	91599251	91599500	ID_1158
chr1	91624001	91624500	ID_1159
chr1	91636001	91636250	ID_1160
chr1	91659501	91659750	ID_1161
chr1	91821501	91821750	ID_1162
chr1	91829251	91829500	ID_1163
chr1	91869501	91869750	ID_1164
chr1	91880251	91880500	ID_1165
chr1	92036001	92036250	ID_1166
chr1	92074501	92074750	ID_1167
chr1	92130001	92130250	ID_1168
chr1	92172501	92172750	ID_1169
chr1	92173251	92173500	ID_1170
chr1	92193001	92193500	ID_1171
chr1	92253251	92253500	ID_1172
chr1	92267751	92268000	ID_1173
chr1	92317751	92318000	ID_1174
chr1	92522501	92522750	ID_1175
chr1	92546501	92546750	ID_1176
chr1	92604251	92604500	ID_1177
chr1	92605001	92605250	ID_1178
chr1	92609251	92609500	ID_1179
chr1	92656501	92656750	ID_1180
chr1	92771751	92772000	ID_1181
chr1	92786751	92787000	ID_1182
chr1	92801251	92801500	ID_1183
chr1	92815001	92815250	ID_1184
chr1	92846251	92846500	ID_1185
chr1	92979751	92980000	ID_1186
chr1	92988001	92988250	ID_1187
chr1	93035501	93035750	ID_1188
chr1	93036751	93037250	ID_1189
chr1	93064251	93064500	ID_1190
chr1	93127251	93127500	ID_1191
chr1	93171501	93171750	ID_1192
chr1	93217001	93217250	ID_1193
chr1	93274001	93274250	ID_1194
chr1	93369251	93369500	ID_1195
chr1	93535751	93536000	ID_1196
chr1	93692751	93693000	ID_1197
chr1	93715001	93715250	ID_1198
chr1	93855251	93855500	ID_1199
chr1	93856501	93856750	ID_1200
chr1	93881751	93882250	ID_1201
chr1	94091251	94091500	ID_1202
chr1	94175751	94176000	ID_1203
chr1	94233501	94233750	ID_1204
chr1	94397251	94397500	ID_1205
chr1	94670251	94670500	ID_1206
chr1	94753251	94753500	ID_1207
chr1	94791501	94792000	ID_1208
chr1	95179501	95180000	ID_1209
chr1	95200251	95200750	ID_1210
chr1	95245251	95245750	ID_1211
chr1	95293001	95293250	ID_1212
chr1	95375501	95375750	ID_1213
chr1	95400751	95401000	ID_1214
chr1	95432751	95433000	ID_1215
chr1	95441751	95442000	ID_1216
chr1	95710501	95710750	ID_1217
chr1	95737251	95737500	ID_1218
chr1	95874251	95874500	ID_1219
chr1	95895751	95896000	ID_1220
chr1	95919001	95919250	ID_1221
chr1	95932501	95932750	ID_1222
chr1	96093251	96093500	ID_1223
chr1	96386501	96386750	ID_1224
chr1	96483251	96483500	ID_1225
chr1	96774501	96774750	ID_1226
chr1	96780751	96781000	ID_1227
chr1	96791501	96791750	ID_1228
chr1	97174501	97174750	ID_1229
chr1	97191751	97192000	ID_1230
chr1	97324001	97324250	ID_1231
chr1	97440251	97440500	ID_1232
chr1	97526501	97527000	ID_1233
chr1	97599001	97599250	ID_1234
chr1	97695251	97695500	ID_1235
chr1	97722001	97722500	ID_1236
chr1	97728501	97728750	ID_1237
chr1	97742501	97742750	ID_1238
chr1	97763001	97763250	ID_1239
chr1	97764001	97764250	ID_1240
chr1	97832751	97833000	ID_1241
chr1	97872251	97872750	ID_1242
chr1	97898751	97899000	ID_1243
chr1	98092001	98092250	ID_1244
chr1	98194751	98195000	ID_1245
chr1	98360501	98360750	ID_1246
chr1	98946751	98947000	ID_1247
chr1	99083501	99083750	ID_1248
chr1	99381501	99381750	ID_1249
chr1	99631001	99631500	ID_1250
chr1	99690751	99691000	ID_1251
chr1	99819251	99819500	ID_1252
chr1	99963001	99963250	ID_1253
chr1	100119001	100119500	ID_1254
chr1	100452501	100453000	ID_1255
chr1	100992751	100993250	ID_1256
chr1	101252501	101252750	ID_1257
chr1	101294001	101294250	ID_1258
chr1	101748001	101748250	ID_1259
chr1	101846751	101847000	ID_1260
chr1	102251501	102251750	ID_1261
chr1	102254251	102254500	ID_1262
chr1	102397501	102397750	ID_1263
chr1	102593501	102593750	ID_1264
chr1	102705751	102706000	ID_1265
chr1	102804751	102805250	ID_1266
chr1	103150251	103150500	ID_1267
chr1	103419501	103419750	ID_1268
chr1	103476251	103476500	ID_1269
chr1	103570751	103571000	ID_1270
chr1	103609001	103609250	ID_1271
chr1	103618001	103618250	ID_1272
chr1	103812501	103812750	ID_1273
chr1	103834001	103834250	ID_1274
chr1	103967751	103968000	ID_1275
chr1	104106751	104107000	ID_1276
chr1	104140501	104140750	ID_1277
chr1	104281501	104282000	ID_1278
chr1	104733001	104733250	ID_1279
chr1	104774751	104775000	ID_1280
chr1	104959501	104959750	ID_1281
chr1	105204001	105204250	ID_1282
chr1	105284751	105285000	ID_1283
chr1	105299501	105299750	ID_1284
chr1	105361251	105361500	ID_1285
chr1	105569251	105569500	ID_1286
chr1	105609001	105609250	ID_1287
chr1	105657751	105658000	ID_1288
chr1	105687001	105687250	ID_1289
chr1	105813501	105814000	ID_1290
chr1	105844501	105845000	ID_1291
chr1	105863251	105863500	ID_1292
chr1	105951751	105952000	ID_1293
chr1	105988501	105988750	ID_1294
chr1	105997751	105998000	ID_1295
chr1	106020001	106020250	ID_1296
chr1	106130501	106130750	ID_1297
chr1	106169751	106170000	ID_1298
chr1	106194501	106194750	ID_1299
chr1	106439501	106439750	ID_1300
chr1	106610501	106610750	ID_1301
chr1	106682251	106682500	ID_1302
chr1	106710001	106710250	ID_1303
chr1	106775251	106775500	ID_1304
chr1	106777001	106777250	ID_1305
chr1	106810001	106810250	ID_1306
chr1	106828501	106828750	ID_1307
chr1	106861251	106861750	ID_1308
chr1	107087251	107087500	ID_1309
chr1	107116001	107116250	ID_1310
chr1	107235001	107235250	ID_1311
chr1	107683751	107684000	ID_1312
chr1	107710501	107710750	ID_1313
chr1	107784751	107785000	ID_1314
chr1	107882501	107883000	ID_1315
chr1	107895251	107895750	ID_1316
chr1	108053501	108053750	ID_1317
chr1	108273001	108273250	ID_1318
chr1	108456251	108456500	ID_1319
chr1	108514001	108514250	ID_1320
chr1	108546001	108546750	ID_1321
chr1	108780501	108780750	ID_1322
chr1	109039751	109040000	ID_1323
chr1	109202751	109203000	ID_1324
chr1	109374251	109374500	ID_1325
chr1	109409751	109410000	ID_1326
chr1	109456501	109456750	ID_1327
chr1	109599251	109599500	ID_1328
chr1	109784751	109785000	ID_1329
chr1	109922751	109923000	ID_1330
chr1	109982251	109983500	ID_1331
chr1	110034251	110034500	ID_1332
chr1	110073251	110073500	ID_1333
chr1	110161751	110162000	ID_1334
chr1	110189501	110189750	ID_1335
chr1	110200501	110200750	ID_1336
chr1	110506251	110506500	ID_1337
chr1	110799251	110799500	ID_1338
chr1	110922001	110922500	ID_1339
chr1	110998501	110998750	ID_1340
chr1	111121251	111121500	ID_1341
chr1	111236001	111236250	ID_1342
chr1	111266251	111266500	ID_1343
chr1	111468751	111469000	ID_1344
chr1	111475501	111476000	ID_1345
chr1	111577751	111578000	ID_1346
chr1	111581251	111581750	ID_1347
chr1	111632251	111632500	ID_1348
chr1	111657751	111658000	ID_1349
chr1	111708751	111709250	ID_1350
chr1	112106751	112107000	ID_1351
chr1	112224751	112225000	ID_1352
chr1	112292251	112292500	ID_1353
chr1	112454001	112454250	ID_1354
chr1	112597251	112597500	ID_1355
chr1	112729751	112730250	ID_1356
chr1	112731251	112731500	ID_1357
chr1	112824501	112824750	ID_1358
chr1	112932001	112932250	ID_1359
chr1	113016251	113016500	ID_1360
chr1	113228751	113229000	ID_1361
chr1	113289001	113289250	ID_1362
chr1	113345751	113346250	ID_1363
chr1	113409751	113410000	ID_1364
chr1	113556251	113556500	ID_1365
chr1	113610501	113610750	ID_1366
chr1	113790001	113790250	ID_1367
chr1	113960251	113960500	ID_1368
chr1	114064001	114064250	ID_1369
chr1	114146251	114146750	ID_1370
chr1	114177001	114177250	ID_1371
chr1	114183251	114183500	ID_1372
chr1	114228751	114229000	ID_1373
chr1	114441001	114441250	ID_1374
chr1	114451001	114451250	ID_1375
chr1	114557001	114557500	ID_1376
chr1	114606001	114606250	ID_1377
chr1	114808751	114809000	ID_1378
chr1	114866001	114866250	ID_1379
chr1	115062251	115062750	ID_1380
chr1	115152751	115153000	ID_1381
chr1	115343001	115343250	ID_1382
chr1	115630251	115630500	ID_1383
chr1	115749501	115750000	ID_1384
chr1	115866751	115867000	ID_1385
chr1	115940251	115940500	ID_1386
chr1	115944251	115944500	ID_1387
chr1	116063501	116063750	ID_1388
chr1	116073001	116073250	ID_1389
chr1	116224001	116224250	ID_1390
chr1	116432251	116432500	ID_1391
chr1	116632251	116632500	ID_1392
chr1	116885001	116885250	ID_1393
chr1	117012501	117012750	ID_1394
chr1	117251001	117251500	ID_1395
chr1	117462001	117462250	ID_1396
chr1	117509501	117509750	ID_1397
chr1	117676501	117676750	ID_1398
chr1	118025001	118025250	ID_1399
chr1	118087251	118087500	ID_1400
chr1	118128251	118128500	ID_1401
chr1	118151751	118152000	ID_1402
chr1	118187501	118187750	ID_1403
chr1	118384251	118384750	ID_1404
chr1	118404251	118404500	ID_1405
chr1	118450001	118450250	ID_1406
chr1	118561251	118561500	ID_1407
chr1	118607751	118608000	ID_1408
chr1	118821751	118822000	ID_1409
chr1	119080501	119080750	ID_1410
chr1	119166251	119166500	ID_1411
chr1	119181751	119182000	ID_1412
chr1	119289751	119290250	ID_1413
chr1	119294751	119295000	ID_1414
chr1	119405751	119406000	ID_1415
chr1	119411251	119411500	ID_1416
chr1	119437251	119437750	ID_1417
chr1	119533751	119534000	ID_1418
chr1	119549501	119549750	ID_1419
chr1	119855751	119856250	ID_1420
chr1	119873251	119873500	ID_1421
chr1	119903501	119903750	ID_1422
chr1	119984751	119985000	ID_1423
chr1	120069501	120069750	ID_1424
chr1	120081251	120081500	ID_1425
chr1	120190751	120191000	ID_1426
chr1	120263751	120264000	ID_1427
chr1	120308001	120308250	ID_1428
chr1	120317751	120318000	ID_1429
chr1	120322751	120323000	ID_1430
chr1	120361751	120362000	ID_1431
chr1	120398251	120398750	ID_1432
chr1	120463751	120464000	ID_1433
chr1	120884251	120884500	ID_1434
chr1	120923751	120924000	ID_1435
chr1	120944751	120945000	ID_1436
chr1	120967001	120967250	ID_1437
chr1	120994001	120994250	ID_1438
chr1	121000501	121000750	ID_1439
chr1	121039251	121039500	ID_1440
chr1	121150001	121150250	ID_1441
chr1	121193251	121193750	ID_1442
chr1	121236751	121237000	ID_1443
chr1	121272001	121272250	ID_1444
chr1	121281751	121282000	ID_1445
chr1	121305751	121306000	ID_1446
chr1	121365001	121365500	ID_1447
chr1	121474251	121474500	ID_1448
chr1	121501501	121501750	ID_1449
chr1	121556001	121556250	ID_1450
chr1	121578001	121578250	ID_1451
chr1	121609751	121610000	ID_1452
chr1	121678251	121678500	ID_1453
chr1	121745751	121746250	ID_1454
chr1	121946751	121947000	ID_1455
chr1	122402501	122402750	ID_1456
chr1	122472001	122472500	ID_1457
chr1	122476751	122477000	ID_1458
chr1	122569501	122569750	ID_1459
chr1	122617001	122617250	ID_1460
chr1	122817751	122818000	ID_1461
chr1	122841251	122841500	ID_1462
chr1	122931501	122931750	ID_1463
chr1	122939001	122939250	ID_1464
chr1	123024001	123024250	ID_1465
chr1	123857001	123857250	ID_1466
chr1	123876751	123877000	ID_1467
chr1	124142751	124143000	ID_1468
chr1	124366751	124367000	ID_1469
chr1	124451501	124451750	ID_1470
chr1	124509501	124509750	ID_1471
chr1	124855001	124855250	ID_1472
chr1	124906001	124906250	ID_1473
chr1	124990001	124990250	ID_1474
chr1	125055001	125055500	ID_1475
chr1	125143001	125143500	ID_1476
chr1	125176251	125176500	ID_1477
chr1	125253501	125253750	ID_1478
chr1	125274251	125274500	ID_1479
chr1	125414501	125414750	ID_1480
chr1	125415751	125416000	ID_1481
chr1	125608001	125608500	ID_1482
chr1	125677751	125678000	ID_1483
chr1	125763501	125763750	ID_1484
chr1	125799001	125799250	ID_1485
chr1	125916751	125917250	ID_1486
chr1	126116751	126117000	ID_1487
chr1	126254501	126254750	ID_1488
chr1	126409001	126409250	ID_1489
chr1	126445501	126445750	ID_1490
chr1	126480251	126480500	ID_1491
chr1	126590501	126590750	ID_1492
chr1	126658751	126659000	ID_1493
chr1	126701501	126701750	ID_1494
chr1	126750001	126750500	ID_1495
chr1	126861501	126861750	ID_1496
chr1	126991751	126992000	ID_1497
chr1	127003501	127003750	ID_1498
chr1	127242251	127242500	ID_1499
chr1	127251751	127252000	ID_1500
chr1	127290751	127291000	ID_1501
chr1	127309001	127309250	ID_1502
chr1	127349501	127349750	ID_1503
chr1	127416751	127417000	ID_1504
chr1	127501251	127501500	ID_1505
chr1	127570501	127570750	ID_1506
chr1	127596001	127596250	ID_1507
chr1	127660501	127661000	ID_1508
chr1	127711501	127711750	ID_1509
chr1	127805251	127805500	ID_1510
chr1	127809251	127809500	ID_1511
chr1	127882251	127882500	ID_1512
chr1	127928751	127929000	ID_1513
chr1	127935751	127936000	ID_1514
chr1	127947251	127947500	ID_1515
chr1	127963751	127964000	ID_1516
chr1	127991501	127991750	ID_1517
chr1	127998501	127998750	ID_1518
chr1	128289751	128290000	ID_1519
chr1	128304751	128305500	ID_1520
chr1	128347501	128347750	ID_1521
chr1	128420751	128421000	ID_1522
chr1	128471251	128472000	ID_1523
chr1	128498501	128499000	ID_1524
chr1	128532001	128532250	ID_1525
chr1	128576001	128576250	ID_1526
chr1	128766751	128767000	ID_1527
chr1	128784001	128784250	ID_1528
chr1	128810501	128810750	ID_1529
chr1	128812251	128812750	ID_1530
chr1	128816251	128816500	ID_1531
chr1	129012501	129012750	ID_1532
chr1	129324251	129324500	ID_1533
chr1	129382751	129383000	ID_1534
chr1	129420001	129420250	ID_1535
chr1	129425751	129426000	ID_1536
chr1	129481251	129481500	ID_1537
chr1	129503251	129503500	ID_1538
chr1	129571501	129571750	ID_1539
chr1	129629001	129629500	ID_1540
chr1	129723001	129723500	ID_1541
chr1	129981751	129982000	ID_1542
chr1	130038501	130039000	ID_1543
chr1	130422751	130423250	ID_1544
chr1	130443501	130443750	ID_1545
chr1	130491001	130491250	ID_1546
chr1	130516001	130516500	ID_1547
chr1	130599751	130600500	ID_1548
chr1	130663751	130664000	ID_1549
chr1	130724751	130725000	ID_1550
chr1	130771251	130771500	ID_1551
chr1	130778251	130778500	ID_1552
chr1	130802501	130802750	ID_1553
chr1	130810001	130810250	ID_1554
chr1	130872251	130872750	ID_1555
chr1	130951251	130951500	ID_1556
chr1	131014001	131014250	ID_1557
chr1	131018751	131019000	ID_1558
chr1	131085001	131085250	ID_1559
chr1	131111251	131111500	ID_1560
chr1	131118251	131119000	ID_1561
chr1	131124001	131124500	ID_1562
chr1	131172501	131172750	ID_1563
chr1	131264751	131265000	ID_1564
chr1	131281001	131281250	ID_1565
chr1	131282751	131283000	ID_1566
chr1	131298251	131298500	ID_1567
chr1	131350251	131350500	ID_1568
chr1	131439501	131439750	ID_1569
chr1	131484501	131484750	ID_1570
chr1	131571751	131572000	ID_1571
chr1	131618001	131618250	ID_1572
chr1	131619251	131619750	ID_1573
chr1	131689501	131689750	ID_1574
chr1	131738501	131738750	ID_1575
chr1	131752251	131752750	ID_1576
chr1	131754751	131755250	ID_1577
chr1	131797501	131797750	ID_1578
chr1	131854751	131855000	ID_1579
chr1	132150751	132151250	ID_1580
chr1	132189501	132189750	ID_1581
chr1	132199001	132199500	ID_1582
chr1	132202751	132203250	ID_1583
chr1	132283751	132284000	ID_1584
chr1	132303751	132304000	ID_1585
chr1	132320501	132320750	ID_1586
chr1	132326001	132326250	ID_1587
chr1	132346251	132346500	ID_1588
chr1	132350001	132350250	ID_1589
chr1	132358001	132358250	ID_1590
chr1	132358751	132359000	ID_1591
chr1	132360251	132360750	ID_1592
chr1	132465501	132465750	ID_1593
chr1	132611001	132611500	ID_1594
chr1	132638751	132639000	ID_1595
chr1	132647501	132647750	ID_1596
chr1	132663251	132663500	ID_1597
chr1	132682001	132682250	ID_1598
chr1	132796251	132796500	ID_1599
chr1	132800751	132801000	ID_1600
chr1	132963501	132963750	ID_1601
chr1	133026501	133027000	ID_1602
chr1	133073751	133074000	ID_1603
chr1	133102001	133102250	ID_1604
chr1	133181251	133181750	ID_1605
chr1	133182501	133183250	ID_1606
chr1	133183501	133183750	ID_1607
chr1	133188751	133189000	ID_1608
chr1	133201001	133201250	ID_1609
chr1	133212251	133212500	ID_1610
chr1	133270001	133270250	ID_1611
chr1	133274001	133274250	ID_1612
chr1	133294001	133294250	ID_1613
chr1	133376501	133376750	ID_1614
chr1	133377751	133378000	ID_1615
chr1	133400001	133400500	ID_1616
chr1	133417251	133417500	ID_1617
chr1	133631501	133631750	ID_1618
chr1	133729751	133730000	ID_1619
chr1	133746501	133746750	ID_1620
chr1	133777751	133778000	ID_1621
chr1	133786501	133786750	ID_1622
chr1	133843251	133843500	ID_1623
chr1	133866251	133866500	ID_1624
chr1	133896751	133897000	ID_1625
chr1	133911501	133911750	ID_1626
chr1	134007501	134007750	ID_1627
chr1	134057001	134057250	ID_1628
chr1	134094751	134095250	ID_1629
chr1	134096001	134097250	ID_1630
chr1	134152751	134153000	ID_1631
chr1	134162751	134163000	ID_1632
chr1	134214251	134214500	ID_1633
chr1	134342501	134342750	ID_1634
chr1	134378751	134379250	ID_1635
chr1	134390751	134391000	ID_1636
chr1	134515001	134515250	ID_1637
chr1	134540001	134540250	ID_1638
chr1	134657751	134658000	ID_1639
chr1	134689001	134689250	ID_1640
chr1	134706001	134706250	ID_1641
chr1	134732001	134732250	ID_1642
chr1	134764001	134764250	ID_1643
chr1	134771501	134772000	ID_1644
chr1	134773251	134773500	ID_1645
chr1	134781251	134781500	ID_1646
chr1	134887501	134888000	ID_1647
chr1	134921751	134922000	ID_1648
chr1	134937751	134938000	ID_1649
chr1	134975501	134975750	ID_1650
chr1	134987751	134988000	ID_1651
chr1	135014001	135014250	ID_1652
chr1	135174501	135174750	ID_1653
chr1	135194501	135194750	ID_1654
chr1	135209001	135209250	ID_1655
chr1	135234001	135235250	ID_1656
chr1	135254251	135254500	ID_1657
chr1	135255001	135255250	ID_1658
chr1	135282001	135282250	ID_1659
chr1	135324251	135324500	ID_1660
chr1	135349751	135350000	ID_1661
chr1	135372251	135372500	ID_1662
chr1	135464751	135465000	ID_1663
chr1	135465501	135465750	ID_1664
chr1	135478751	135479250	ID_1665
chr1	135513001	135513250	ID_1666
chr1	135576501	135577000	ID_1667
chr1	135582251	135582500	ID_1668
chr1	135585751	135586000	ID_1669
chr1	135628501	135629000	ID_1670
chr1	135709751	135710000	ID_1671
chr1	135714001	135714250	ID_1672
chr1	135748751	135749000	ID_1673
chr1	135776001	135776500	ID_1674
chr1	135787251	135787500	ID_1675
chr1	135821001	135821250	ID_1676
chr1	135822001	135822500	ID_1677
chr1	135826251	135826500	ID_1678
chr1	135831001	135831250	ID_1679
chr1	135852251	135852500	ID_1680
chr1	135862251	135863000	ID_1681
chr1	135865751	135866250	ID_1682
chr1	135904501	135904750	ID_1683
chr1	135934001	135934250	ID_1684
chr1	135961251	135961500	ID_1685
chr1	136044501	136044750	ID_1686
chr1	136073251	136073500	ID_1687
chr1	136094001	136094250	ID_1688
chr1	136115751	136116250	ID_1689
chr1	136163501	136163750	ID_1690
chr1	136185501	136185750	ID_1691
chr1	136220251	136220500	ID_1692
chr1	136303251	136303500	ID_1693
chr1	136445251	136445500	ID_1694
chr1	136456001	136456250	ID_1695
chr1	136578501	136578750	ID_1696
chr1	136610001	136610250	ID_1697
chr1	136623001	136623250	ID_1698
chr1	136625501	136625750	ID_1699
chr1	136656501	136657000	ID_1700
chr1	136912001	136912500	ID_1701
chr1	136936251	136936500	ID_1702
chr1	136947251	136948250	ID_1703
chr1	136952001	136952750	ID_1704
chr1	136966751	136967250	ID_1705
chr1	136980251	136980500	ID_1706
chr1	137051501	137051750	ID_1707
chr1	137158251	137158500	ID_1708
chr1	137219001	137219250	ID_1709
chr1	137248501	137248750	ID_1710
chr1	137367001	137367250	ID_1711
chr1	137594001	137594250	ID_1712
chr1	137774501	137774750	ID_1713
chr1	137807001	137807500	ID_1714
chr1	137878001	137878250	ID_1715
chr1	138092001	138092250	ID_1716
chr1	138174501	138174750	ID_1717
chr1	138179001	138179250	ID_1718
chr1	138194501	138194750	ID_1719
chr1	138277001	138277250	ID_1720
chr1	138311751	138312000	ID_1721
chr1	138329251	138329500	ID_1722
chr1	138330751	138331000	ID_1723
chr1	138406751	138407000	ID_1724
chr1	138468251	138468500	ID_1725
chr1	138615001	138615250	ID_1726
chr1	138620501	138620750	ID_1727
chr1	138625751	138626250	ID_1728
chr1	138629001	138629250	ID_1729
chr1	138769251	138769500	ID_1730
chr1	138789001	138789250	ID_1731
chr1	138847251	138847500	ID_1732
chr1	138854251	138854500	ID_1733
chr1	138864501	138864750	ID_1734
chr1	138876251	138876500	ID_1735
chr1	138955501	138955750	ID_1736
chr1	138975251	138975500	ID_1737
chr1	138982501	138982750	ID_1738
chr1	139011501	139011750	ID_1739
chr1	139102251	139102500	ID_1740
chr1	139180501	139180750	ID_1741
chr1	139296001	139296500	ID_1742
chr1	139727001	139727250	ID_1743
chr1	139826501	139826750	ID_1744
chr1	139867751	139868000	ID_1745
chr1	139879501	139879750	ID_1746
chr1	139909251	139909500	ID_1747
chr1	139980751	139981000	ID_1748
chr1	140022251	140022500	ID_1749
chr1	140322751	140323000	ID_1750
chr1	140625751	140626000	ID_1751
chr1	140639501	140639750	ID_1752
chr1	140736251	140736750	ID_1753
chr1	140789501	140789750	ID_1754
chr1	140821501	140821750	ID_1755
chr1	140923751	140924250	ID_1756
chr1	141190251	141190500	ID_1757
chr1	141327251	141327500	ID_1758
chr1	141372001	141372250	ID_1759
chr1	141460251	141460500	ID_1760
chr1	141524251	141524500	ID_1761
chr1	141658751	141659000	ID_1762
chr1	141863251	141863500	ID_1763
chr1	141905251	141905750	ID_1764
chr1	142355751	142356000	ID_1765
chr1	142500251	142500500	ID_1766
chr1	142729001	142729250	ID_1767
chr1	142742751	142743000	ID_1768
chr1	142969251	142969500	ID_1769
chr1	142997001	142997250	ID_1770
chr1	143022751	143023000	ID_1771
chr1	143110501	143111000	ID_1772
chr1	143160751	143161000	ID_1773
chr1	143493001	143493250	ID_1774
chr1	143572501	143572750	ID_1775
chr1	143679751	143680250	ID_1776
chr1	143727001	143727250	ID_1777
chr1	143770501	143771000	ID_1778
chr1	143776001	143776250	ID_1779
chr1	143789251	143789500	ID_1780
chr1	143874001	143874250	ID_1781
chr1	143884251	143884500	ID_1782
chr1	143906251	143906500	ID_1783
chr1	143969751	143970000	ID_1784
chr1	143970751	143971000	ID_1785
chr1	144060751	144061000	ID_1786
chr1	144061251	144061500	ID_1787
chr1	144255751	144256000	ID_1788
chr1	144317501	144317750	ID_1789
chr1	144725751	144726250	ID_1790
chr1	144754251	144754500	ID_1791
chr1	145155501	145155750	ID_1792
chr1	145292251	145292500	ID_1793
chr1	145751751	145752000	ID_1794
chr1	145765501	145765750	ID_1795
chr1	146054751	146055000	ID_1796
chr1	146187251	146187500	ID_1797
chr1	146203501	146203750	ID_1798
chr1	146440001	146440250	ID_1799
chr1	146467001	146467250	ID_1800
chr1	146706251	146706500	ID_1801
chr1	146780251	146780500	ID_1802
chr1	146995001	146995250	ID_1803
chr1	147024751	147025000	ID_1804
chr1	147191501	147191750	ID_1805
chr1	147199501	147200000	ID_1806
chr1	147545251	147545500	ID_1807
chr1	148025001	148025250	ID_1808
chr1	148390001	148390250	ID_1809
chr1	148435751	148436000	ID_1810
chr1	148555251	148555500	ID_1811
chr1	149162751	149163000	ID_1812
chr1	149165751	149166000	ID_1813
chr1	149393001	149393250	ID_1814
chr1	149511251	149511500	ID_1815
chr1	149518751	149519000	ID_1816
chr1	149750001	149750250	ID_1817
chr1	149872751	149873000	ID_1818
chr1	149934251	149934500	ID_1819
chr1	149978751	149979000	ID_1820
chr1	150172251	150172500	ID_1821
chr1	150220501	150220750	ID_1822
chr1	150224751	150225000	ID_1823
chr1	150297501	150298000	ID_1824
chr1	150353251	150353500	ID_1825
chr1	150466751	150467250	ID_1826
chr1	150681001	150681500	ID_1827
chr1	150701251	150701500	ID_1828
chr1	151031501	151032250	ID_1829
chr1	151063501	151063750	ID_1830
chr1	151089751	151090000	ID_1831
chr1	151102251	151102500	ID_1832
chr1	151164751	151165000	ID_1833
chr1	151208751	151209000	ID_1834
chr1	151236751	151237000	ID_1835
chr1	151250751	151251000	ID_1836
chr1	151287501	151288000	ID_1837
chr1	151289251	151289750	ID_1838
chr1	151340501	151340750	ID_1839
chr1	151374001	151374250	ID_1840
chr1	151411251	151411500	ID_1841
chr1	151518751	151519250	ID_1842
chr1	151649501	151649750	ID_1843
chr1	151770251	151770500	ID_1844
chr1	151830751	151831250	ID_1845
chr1	151854501	151855000	ID_1846
chr1	151943501	151944000	ID_1847
chr1	152099501	152099750	ID_1848
chr1	152130251	152130500	ID_1849
chr1	152213751	152214000	ID_1850
chr1	152249751	152250000	ID_1851
chr1	152369751	152370000	ID_1852
chr1	152450501	152450750	ID_1853
chr1	152457501	152457750	ID_1854
chr1	152493251	152493500	ID_1855
chr1	152515501	152515750	ID_1856
chr1	152524501	152525000	ID_1857
chr1	152531501	152531750	ID_1858
chr1	152536501	152536750	ID_1859
chr1	152578501	152578750	ID_1860
chr1	152583751	152584000	ID_1861
chr1	152628501	152628750	ID_1862
chr1	152677251	152677500	ID_1863
chr1	152713001	152713500	ID_1864
chr1	152737001	152737250	ID_1865
chr1	152755001	152755250	ID_1866
chr1	152961751	152962000	ID_1867
chr1	153130501	153131000	ID_1868
chr1	153145001	153145250	ID_1869
chr1	153154501	153155000	ID_1870
chr1	153246001	153246250	ID_1871
chr1	153275751	153276000	ID_1872
chr1	153281001	153281250	ID_1873
chr1	153323501	153323750	ID_1874
chr1	153360501	153360750	ID_1875
chr1	153410251	153410500	ID_1876
chr1	153430251	153430500	ID_1877
chr1	153478501	153478750	ID_1878
chr1	153495501	153495750	ID_1879
chr1	153566251	153566500	ID_1880
chr1	153658001	153658250	ID_1881
chr1	153675501	153675750	ID_1882
chr1	153770251	153770750	ID_1883
chr1	153776751	153777250	ID_1884
chr1	153779001	153779250	ID_1885
chr1	153807751	153808000	ID_1886
chr1	153838251	153838500	ID_1887
chr1	153855251	153855500	ID_1888
chr1	153890001	153890250	ID_1889
chr1	153981501	153982000	ID_1890
chr1	154024501	154024750	ID_1891
chr1	154029501	154029750	ID_1892
chr1	154079001	154079250	ID_1893
chr1	154156251	154156750	ID_1894
chr1	154218251	154218500	ID_1895
chr1	154300501	154300750	ID_1896
chr1	154391501	154391750	ID_1897
chr1	154466751	154467250	ID_1898
chr1	154549251	154549500	ID_1899
chr1	154624501	154624750	ID_1900
chr1	154706751	154707250	ID_1901
chr1	154792251	154792500	ID_1902
chr1	154887251	154887500	ID_1903
chr1	154919751	154920000	ID_1904
chr1	155030751	155031250	ID_1905
chr1	155074751	155075000	ID_1906
chr1	155138501	155138750	ID_1907
chr1	155199251	155199750	ID_1908
chr1	155206501	155206750	ID_1909
chr1	155246501	155246750	ID_1910
chr1	155285501	155286000	ID_1911
chr1	155395751	155396000	ID_1912
chr1	155422251	155422750	ID_1913
chr1	155456251	155456500	ID_1914
chr1	155474751	155475000	ID_1915
chr1	155527751	155528250	ID_1916
chr1	155528751	155529000	ID_1917
chr1	155602751	155603000	ID_1918
chr1	155684751	155685000	ID_1919
chr1	155690251	155690500	ID_1920
chr1	155717251	155717500	ID_1921
chr1	155803251	155803500	ID_1922
chr1	155992001	155992250	ID_1923
chr1	156215501	156215750	ID_1924
chr1	156221501	156221750	ID_1925
chr1	156341001	156341250	ID_1926
chr1	156345751	156346000	ID_1927
chr1	156380001	156380250	ID_1928
chr1	156422501	156423000	ID_1929
chr1	156509001	156509250	ID_1930
chr1	156516251	156516750	ID_1931
chr1	156641001	156641250	ID_1932
chr1	156705501	156705750	ID_1933
chr1	156726501	156726750	ID_1934
chr1	156733251	156733500	ID_1935
chr1	156763001	156763500	ID_1936
chr1	156782501	156783000	ID_1937
chr1	156806251	156806750	ID_1938
chr1	156813001	156813250	ID_1939
chr1	156825501	156825750	ID_1940
chr1	156839001	156839250	ID_1941
chr1	156858251	156858750	ID_1942
chr1	156915501	156915750	ID_1943
chr1	157030001	157030500	ID_1944
chr1	157051751	157052000	ID_1945
chr1	157079751	157080250	ID_1946
chr1	157081251	157081500	ID_1947
chr1	157088751	157089000	ID_1948
chr1	157131501	157131750	ID_1949
chr1	157288501	157288750	ID_1950
chr1	157414251	157414500	ID_1951
chr1	157513501	157514000	ID_1952
chr1	157527001	157527500	ID_1953
chr1	157628751	157629000	ID_1954
chr1	157645751	157646000	ID_1955
chr1	157741001	157741250	ID_1956
chr1	157747501	157747750	ID_1957
chr1	157822001	157822250	ID_1958
chr1	157832001	157832250	ID_1959
chr1	157892251	157892500	ID_1960
chr1	157904501	157904750	ID_1961
chr1	157982001	157982500	ID_1962
chr1	158045001	158045250	ID_1963
chr1	158232251	158232500	ID_1964
chr1	158291501	158291750	ID_1965
chr1	158390501	158391000	ID_1966
chr1	158435501	158435750	ID_1967
chr1	158560501	158560750	ID_1968
chr1	158577001	158577250	ID_1969
chr1	158593251	158593500	ID_1970
chr1	158699501	158699750	ID_1971
chr1	158865751	158866000	ID_1972
chr1	158884501	158884750	ID_1973
chr1	158936251	158936500	ID_1974
chr1	159065001	159065250	ID_1975
chr1	159166751	159167000	ID_1976
chr1	159193001	159193500	ID_1977
chr1	159206751	159207250	ID_1978
chr1	159225001	159225750	ID_1979
chr1	159272501	159272750	ID_1980
chr1	159384251	159384500	ID_1981
chr1	159527751	159528250	ID_1982
chr1	159581001	159581250	ID_1983
chr1	159647501	159647750	ID_1984
chr1	159660001	159660250	ID_1985
chr1	159725501	159725750	ID_1986
chr1	159747251	159747750	ID_1987
chr1	159861001	159861500	ID_1988
chr1	159889001	159889500	ID_1989
chr1	159933501	159933750	ID_1990
chr1	160100001	160100250	ID_1991
chr1	160217251	160217500	ID_1992
chr1	160300501	160300750	ID_1993
chr1	160394251	160394500	ID_1994
chr1	160624751	160625000	ID_1995
chr1	160673751	160674000	ID_1996
chr1	160711501	160711750	ID_1997
chr1	160724501	160724750	ID_1998
chr1	160730251	160730500	ID_1999
chr1	160962751	160963000	ID_2000
[truncated: 35,175 more rows]
